# Supplementary material
Source: PubMed Central journal article supplement (PMC3343364)
Supplement: NIHMS144805-supplement-01.pdf [file NIHMS144805-supplement-01.pdf]

## Supplementary Figures

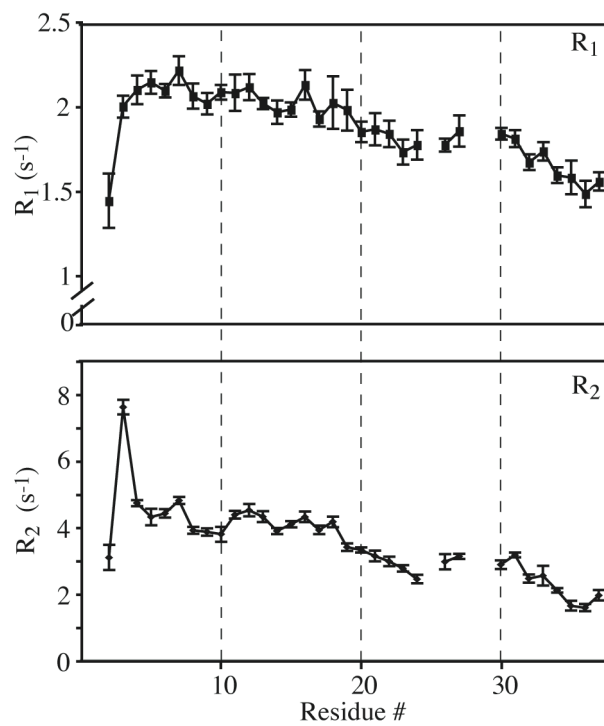

**Supplementary Figure 1.**  $^{15}\text{N}$  longitudinal ( $R_1$ ) and transverse ( $R_2$ ) relaxation rates for rIAPP measured under standard conditions. Error bars were generated from confidence in fits calculated from single measurements.

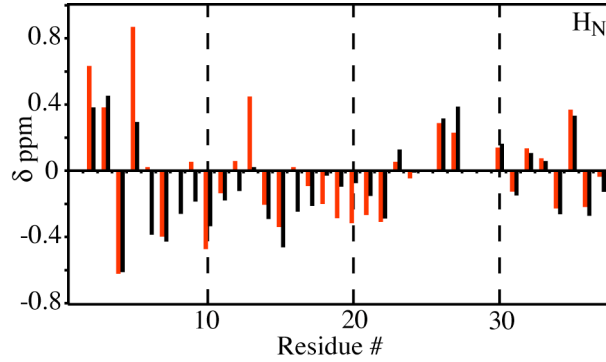

**Supplementary Figure 2.**  $^1\text{H}_\text{N}$  secondary shifts of rIAPP in solution (black) and bound to bicelles (red).

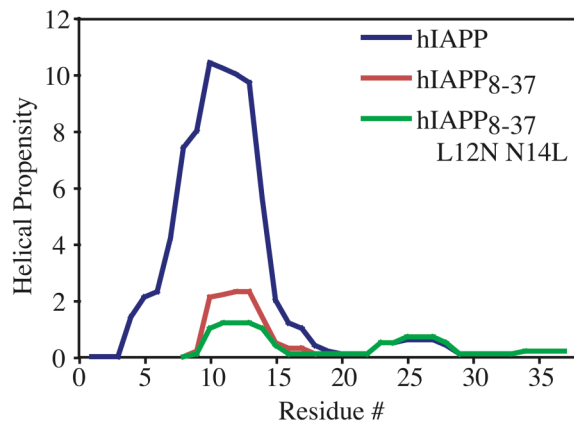

**Supplementary Figure 3.** AGADIR helical predictions for IAPP variants. Full-length hIAPP (blue), truncated hIAPP<sub>8-37</sub> (red) and truncated, mutated hIAPP<sub>8-37</sub> L12N/N14L (green) were predicted at pH 7.4 and 25°C.
